# Supplementary material for: A zinc porphyrin-based molecular probe for the determination of contamination in commercial acetonitrile
Source: Royal Society of Chemistry journal article supplement (doi:10.1039/c2cc31149f), 2012-01-01
Supplement: c2cc31149f.pdf [file c2cc31149f.pdf]

# Supporting Information

**Materials and measurements.** Acetonitrile was purchased from 6 different companies, i.e., Sigma-aldrich, alfa, Samchun, TCI, Kanto, and Junsei. All anions were used as a form of tetrabutylammonium salt, which have used as received from Sigma-aldrich. Electronic absorption spectra were recorded on a JASCO model V-660 spectrometer. Fluorescence emission spectra were recorded on a JASCO model FP-6300 spectrometer.

## Spectroscopic titration of cyanide to **1** and ZnTPP

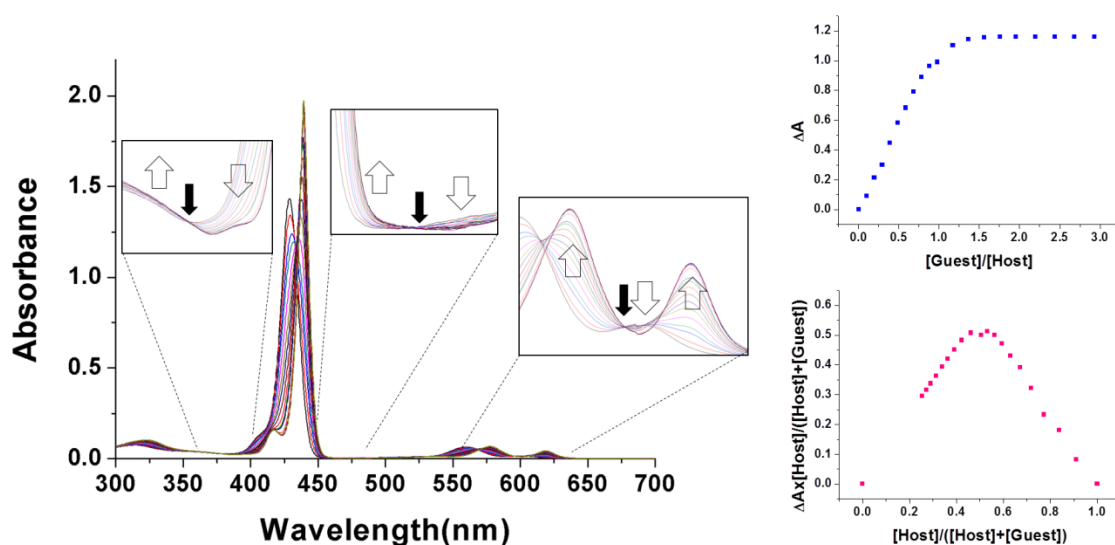

**Figure S1.** Spectroscopic titration of **1** with  $\text{CN}^-$  in purified MeCN at 25 °C.  $[\mathbf{1}] = 3.90 \times 10^{-6}$  M,  $[\text{TBA-CN}]/[\mathbf{1}] = 0\text{--}3.0$ , 1 cm thick optical cell;  $\Delta \text{Abs}$  was monitored at 439 nm ( $K = 2.12 \times 10^7$ ); solid arrow pointing out isosbestic points.

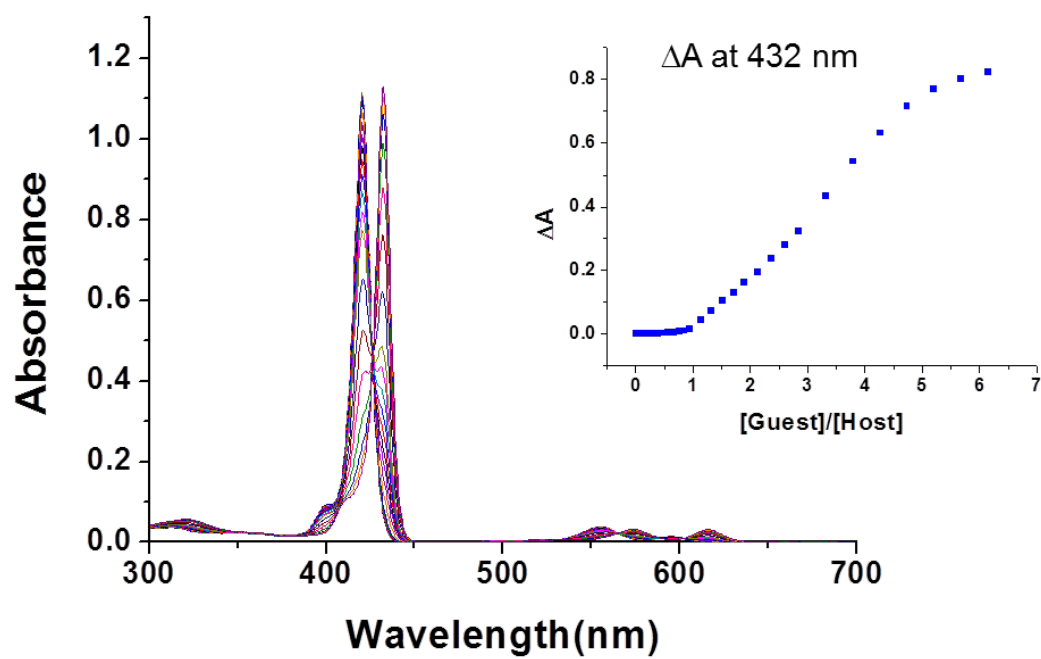

**Figure S2.** Spectroscopic titration of ZnTPP with  $\text{CN}^-$  in purified MeCN at 25 °C
